# Supplementary material
Source: Springer Nature journal article supplement (https://www.springermedizin.de/resource/supplementary/12985_2009_781_MOESM7_ESM.pdf/9609148)

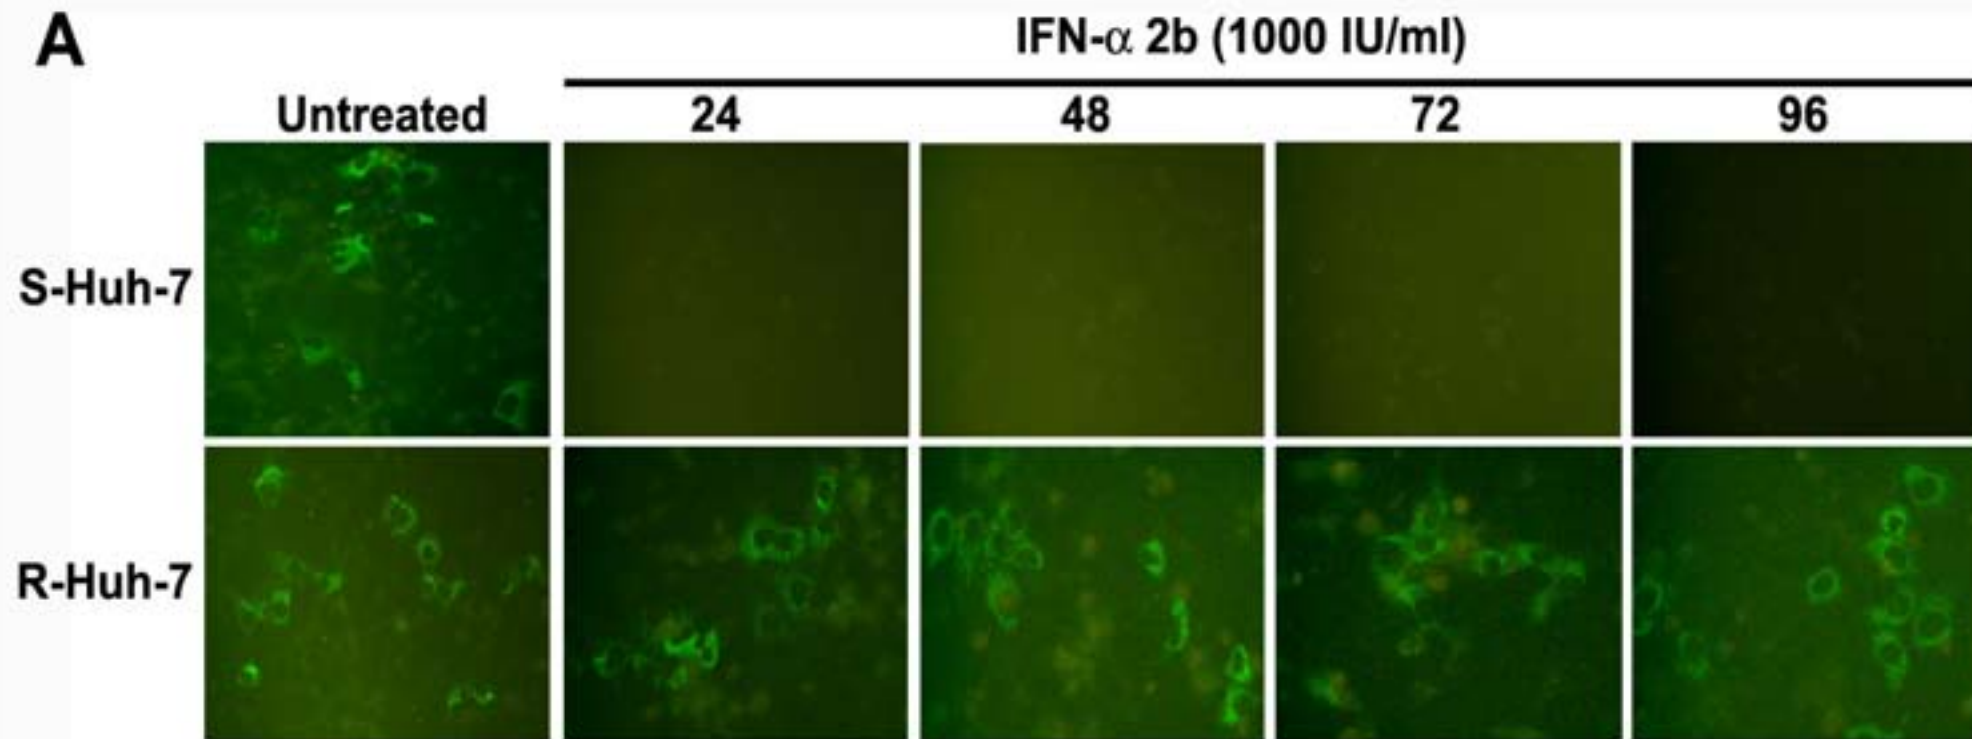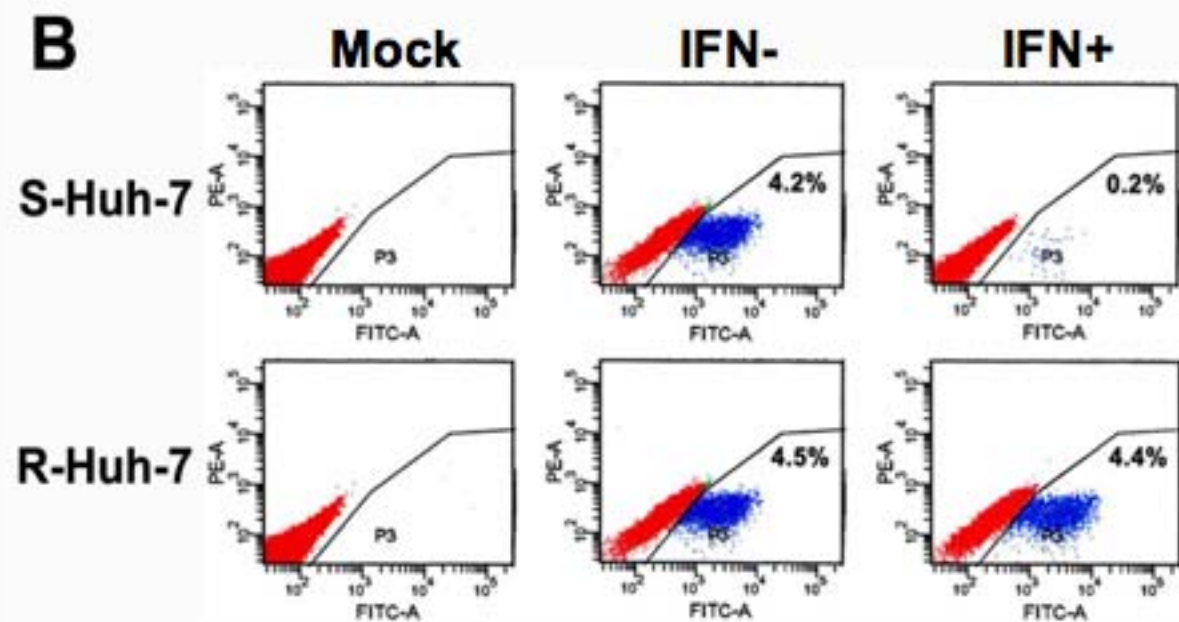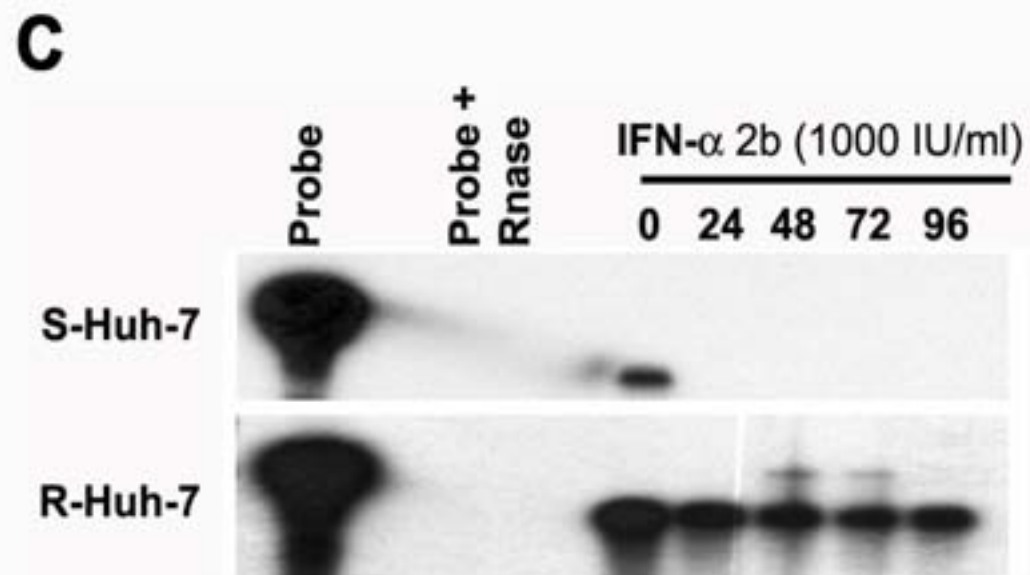

Supplement: MOESM7 [file 9609148]
